# Supplementary material
Source: MDPI journal article supplement (https://www.mdpi.com/1424-2818/15/5/585)
Supplement: s1 [file s1]

Supplement Figure S1. The structure of the risk assessment scheme.

## Structure of the IAS risk assessment scheme

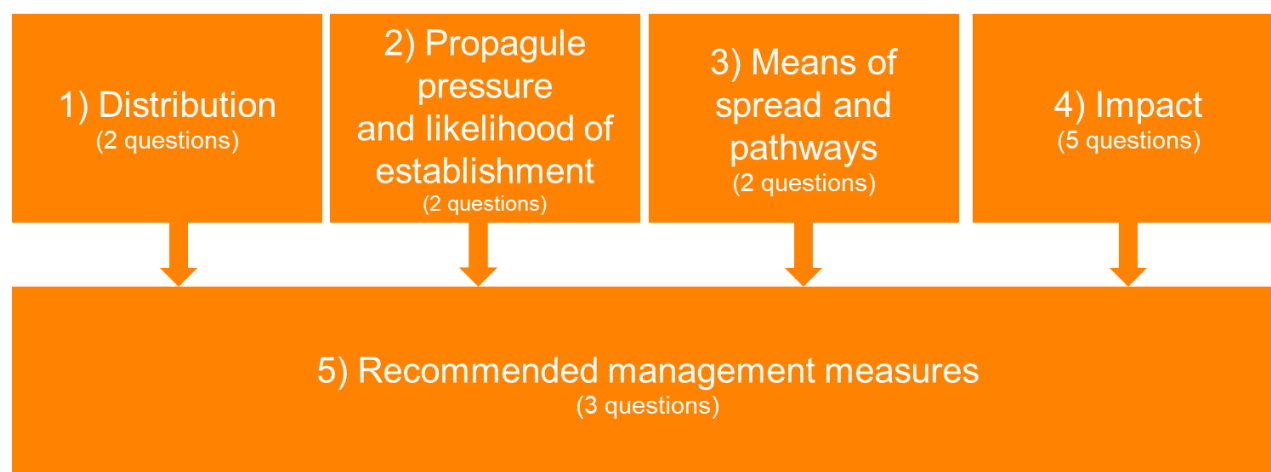

### 1) Distribution

#### Distribution of species in Finland

- 1 = No observations from Finland
- 2 = Species is occasionally kept as a pet / a garden plant indoors or in garden
- 3 = Species is commonly kept as a pet / a garden plant indoors or in garden
- 4 = Species has occasionally been observed in the wild in Finland (during last 10 years)
- 5 = Species has regularly been observed in the wild in Finland (no reproducing population)
- 6 = Species has established in the wild in Finland (reproducing population)

#### Distribution of species in the neighbouring countries of Finland (Sweden, Norway, Estonia, Russia (near Finnish border) and Baltic Sea)

- 1 = No observations
- 2 = Species is occasionally kept as a pet / a garden plant indoors or in garden
- 3 = Species is commonly kept as a pet / a garden plant indoors or in garden
- 4 = Species has occasionally been observed in the wild
- 5 = Species has regularly been observed in the wild in Finland (no reproducing population)
- 6 = Species has established in the wild in Finland (reproducing population)

### 2) Propagule pressure and likelihood of establishment

#### Individuals of species enter (i.e. before import prohibition of alien species legislation) to Finland

- 1 = No observations
- 2 = Occasionally
- 3 = Regularly

**Species succeeds in Finnish climate conditions (potential for spread and reproduction)**

- 1 = Low probability or not likely
- 2 = Moderate probability
- 3 = High probability
- 4 = Is known to succeed (verified)

**3) Means of spread and spread pathways**

**Means of spread to the wild (principal)**

- 0 = Not likely spread to Finland
- A = Intentional spread by humans outside Finland
- B = Unintentional spread by humans outside Finland
- C = Natural spread from neighbouring countries
- D = Intentional spread by humans within Finland
- E = Unintentional spread by humans within Finland
- F = Natural spread within Finland

**Number of pathways**

- 0 = No likely pathways
- 1 = One
- 2 = Many
- 3 = Not known

**4) Impact**

**Risks of harmful impacts when species spread to Finland / within Finland**

**Has species found harmful in climate conditions comparable to Finland?**

- 1 = No
- 2 = Locally
- 3 = Widely

**Would species harm native species by predation, competition, spreading diseases/parasites, breeding or other way? (If native species is endangered, this is critical)**

- 1 = No likely harm
- 2 = Minor probability
- 3 = Moderate probability
- 4 = Major probability
- 5 = Is known to harm (established species)

**Would species harm natural habitats and/or ecosystems by changing or destroying them or by affecting food chain?**

- 1 = No likely harm
- 2 = Minor probability
- 3 = Moderate probability
- 4 = Major probability
- 5 = Is known to harm (established species)

**Would species have economic or social harm for society?**

- 1 = No likely harm
- 2 = Minor probability
- 3 = Moderate probability
- 4 = Major probability
- 5 = Is known to harm (established species)

**Would species harm human health or security?**

- 1 = No likely harm
- 2 = Minor probability
- 3 = Moderate probability
- 4 = Major probability
- 5 = Is known to harm (established species)

**5) Management measures****Establishment status of species in Finland**

- A1 = Spreading and success very unlikely
- B1 = Propagules of species do not spread regularly, establishment in the wild possible
- B2 = Propagules of species spread regularly, establishment in the wild unlikely
- B3 = Establishment of species possible
- C1 = Established, but locally distributed
- C2 = Established and widely distributed

**Urgency of management measures**

- 1 = Management not topical in Finland
- 2 = Monitoring situation
- 3 = Control at the early stage of invasion
- 4 = Immediate measures (established species)

**Recommended primary management measures for species**

- 1 = Monitoring distribution (outside Finland)
- 2 = Prevention of entry
- 3 = Prevention of escape into nature
- 4 = Prevention of establishment
- 5 = Prevention of further spread
- 6 = Management of areas with high biodiversity value
- 7 = Eradication
- 8 = No cost-effective eradication methods available
