# Supplementary material
Source: MDPI journal article supplement (https://www.mdpi.com/1424-2818/15/5/585)
Supplement: s1 [file s1 › Supplement Table S1.xlsx]

## Sheet: Table S1
Species	Species group	Distribution in Finland	Probability to succeed in Finnish climate	Primary means of spread	Overall impact	Establishment status	Urgency of the management measures	Primary management method	Reference
Acacia saligna	Plant	1	1	0	None	A1	1	Prevention of entry	Huusela et al. 2021
Acridotheres tristis	Bird	4	4	0	Minor	A1	1	Prevention of entry	Huusela et al. 2021
Ailanthus altissima	Plant	2	2	A, D	Minor	B1	3	Eradication	Huusela et al. 2021
Alopochen aegyptiaca	Bird	1	6	0	Moderate	A1	1	Prevention of entry	Huusela-Veistola et al. 2019
Alternanthera philoxeroides	Plant	1	1	0	None	A1	1	Prevention of entry	Huusela-Veistola et al. 2019
Ameiurus melas	Fish	1	1	A	Minor	B1	1	Prevention of entry	Huusela et al. 2023
Andropogon virginicus	Plant	1	1	0	None	A1	1	Monitoring	Huusela et al. 2021
Arthurdendyus triangulatus	Other invertebrate	1	1	0	None	A1	1	Prevention of entry	Huusela et al. 2021
Asclepias syriaca	Plant	2	4	A, D	Moderate	B3	3	Eradication	Huusela-Veistola et al. 2019
Axis axis	Mammal	1	1	A, C	None	A1	1	Prevention of entry	Huusela et al. 2023
Baccharis halimifolia	Plant	1	1	0	Minor	A1	1	Monitoring	Huusela-Veistola et al. 2017
Cabomba caroliniana	Plant	3	3	A, D	None	B2	3	Prevention of escape	Huusela-Veistola et al. 2017
Callosciurus erythraeus	Mammal	1	2	0	Minor	A1	1	Prevention of entry	Huusela-Veistola et al. 2017
Callosciurus finlaysonii	Mammal	1	2	A	None	A1	1	Prevention of entry	Huusela et al. 2023
Cardiospermum grandiflorum	Plant	1	1	0	None	A1	1	Prevention of entry	Huusela et al. 2021
Celastrus orbiculatus	Plant	2	2	A ,D, E	Minor	B3	3	Eradication	Huusela et al. 2023
Cenchrus setaceus	Plant	2	2	A, D	None	B2	3	Prevention of escape	Huusela-Veistola et al. 2019
Channa argus	Fish	1	1	0	Moderate	B1	1	Prevention of entry	Huusela et al. 2023
Cortaderia jubata	Plant	1	1	0	Minor	A1	1	Monitoring	Huusela et al. 2021
Corvus splendens	Bird	1	1	0	None	A1	1	Monitoring	Huusela-Veistola et al. 2017
Ehrharta calycina	Plant	1	1	0	None	A1	1	Monitoring	Huusela et al. 2021
Eichhornia crassipes	Plant	2	2	A, D	None	B2	3	Prevention of escape	Huusela-Veistola et al. 2017
Elodea nuttallii	Plant	1	6	C	Major	B1	2	Prevention of entry	Huusela-Veistola et al. 2019
Eriocheir sinensis	Other invertebrate	5	5	B	None	B2	2	Monitoring	Huusela-Veistola et al. 2017
Faxonius rusticus	Other invertebrate	1	1	0	Moderate	B1	1	Prevention of entry	Huusela et al. 2023
Fundulus heteroclitus	Fish	1	2	A	Minor	B1	1	Prevention of entry	Huusela et al. 2023
Gambusia affinis	Fish	1	1	0	Minor	A1	1	Monitoring	Huusela et al. 2023
Gambusia holbrooki	Fish	1	1	0	None	A1	1	Monitoring	Huusela et al. 2023
Gunnera tinctoria	Plant	1	2	0	None	A1	3	Prevention of entry	Huusela-Veistola et al. 2019					84
Gymnocoronis spilanthoides	Plant	2	2	A	None	A1	1	Prevention of entry	Huusela et al. 2021
Hakea sericea	Plant	1	1	0	None	A1	1	Monitoring	Huusela et al. 2023
Heracleum mantegazzianum	Plant	6	6	E, F	Massive	C2	4	Prevention of spread	Huusela-Veistola et al. 2019
Heracleum persicum	Plant	6	6	E, F	Massive	C2	4	Eradication	Huusela-Veistola et al. 2017
Heracleum sosnowskyi	Plant	6	6	E, F	Massive	C2	4	Eradication	Huusela-Veistola et al. 2017
Herpestes javanicus	Mammal	1	1	0	Minor	B1	1	Monitoring	Huusela-Veistola et al. 2017
Humulus scandens	Plant	2	2	A	Minor	B2	3	Prevention of escape	Huusela et al. 2021
Hydrocotyle ranunculoides	Plant	2	2	A, D	None	A1	3	Prevention of escape	Huusela-Veistola et al. 2017
Impatiens glandulifera	Plant	6	6	E, F	Major	C2	4	Prevention of spread	Huusela-Veistola et al. 2019
Koenigia polystachya	Plant	1	2	A	Minor	B1	3	Prevention of entry	Huusela et al. 2023
Lagarosiphon major	Plant	2	2	A, D	None	A1	3	Prevention of escape	Huusela-Veistola et al. 2017
Lampropeltis getula	Reptile	2	3	A, B, D	None	A1	1	Prevention of escape	Huusela et al. 2023
Lepomis gibbosus	Fish	6	6	A, D	Moderate	C1	4	Eradication	Huusela et al. 2021
Lespedeza cuneata	Plant	1	1	0	Minor	A1	1	Monitoring	Huusela et al. 2021
Limnoperna fortunei	Other invertebrate	1	1	0	Minor	A1	1	Monitoring	Huusela et al. 2023
Lithobates (Rana) catesbeianus	Amphibian	1	1	0	Minor	B1	3	Prevention of entry	Huusela-Veistola et al. 2017
Ludwigia grandiflora	Plant	1	1	A	None	A1	1	Monitoring	Huusela-Veistola et al. 2017
Ludwigia peploides	Plant	1	1	0	None	A1	1	Monitoring	Huusela-Veistola et al. 2017
Lycodium japonicum	Plant	1	1	0	None	A1	1	Monitoring	Huusela et al. 2021
Lysichiton americanus	Plant	6	6	D	Moderate	C1	4	Eradication	Huusela-Veistola et al. 2017
Microstegium vimineum	Plant	1	1	0	Major	B1	3	Prevention of entry	Huusela-Veistola et al. 2019
Morone americana	Fish	1	1	A, B	Minor	B1	1	Prevention of entry	Huusela et al. 2023
Muntiacus reevesii	Mammal	1	1	0	Minor	A1	1	Prevention of entry	Huusela-Veistola et al. 2017
Myocastor coypus	Mammal	1	1	0	Minor	A1	1	Monitoring	Huusela-Veistola et al. 2017
Myriophyllum aquaticum	Plant	2	2	A, D	None	A1	3	Prevention of escape	Huusela-Veistola et al. 2017
Myriophyllum heterophyllum	Plant	1	1	0	None	B1	2	Prevention of entry	Huusela-Veistola et al. 2019
Nasua nasua	Mammal	1	1	0	None	A1	1	Prevention of entry	Huusela-Veistola et al. 2017
Nyctereutes procyonoides	Mammal	6	6	F	Moderate	C2	4	Prevention of spread	Huusela-Veistola et al. 2019
Ondatra zibethicus	Mammal	6	6	F	Minor	C2	2	Monitoring	Huusela-Veistola et al. 2019
Orconectes limosus	Other invertebrate	2	4	A, D	Minor	B3	3	Prevention of escape	Huusela-Veistola et al. 2017
Orconectes virilis	Other invertebrate	2	3	A, D	Minor	B3	3	Prevention of escape	Huusela-Veistola et al. 2017
Oxyura jamaicensis	Bird	4	5	C	None	B1	2	Monitoring	Huusela-Veistola et al. 2017
Pacifastacus leniusculus	Other invertebrate	6	6	D	Major	C2	4	Prevention of spread	Huusela-Veistola et al. 2017
Parthenium hysterophorus	Plant	1	1	0	None	A1	1	Monitoring	Huusela-Veistola et al. 2017
Perccottus glenii	Fish	2	6	A	Moderate	B3	3	Prevention of entry	Huusela-Veistola et al. 2017
Persicaria perfoliata	Plant	1	1	0	None	A1	1	Monitoring	Huusela-Veistola et al. 2017
Pistia stratiotes	Plant	3	3	A, D	Minor	B2	3	Prevention of escape	Huusela et al. 2023
Plotosus lineatus	Fish	2	2	A, D	None	A1	3	Prevention of entry	Huusela et al. 2021
Procambarus clarkii	Other invertebrate	2	3	A, D	Minor	B3	3	Prevention of escape	Huusela-Veistola et al. 2017
Procambarus fallax forma virginalis	Other invertebrate	2	4	A, B, D	Minor	B3	3	Prevention of escape	Huusela-Veistola et al. 2017
Procyon lotor	Mammal	2	5	A, E	Moderate	B3	3	Prevention of escape	Huusela-Veistola et al. 2017
Prosopis julilora	Plant	1	1	0	None	A1	1	Prevention of entry	Huusela et al. 2021
Pseudorasbora parva	Fish	2	1	B	Moderate	B3	3	Prevention of entry	Huusela-Veistola et al. 2017
Pueraria montana	Plant	1	1	0	Minor	A1	1	Monitoring	Huusela-Veistola et al. 2017
Pycnonotus cafer	Bird	1	1	0	None	A1	1	Monitoring	Huusela et al. 2023
Rugulopteryx okamurae	Other invertebrate	1	1	0	None	A1	1	Monitoring	Huusela et al. 2023
Salvinia molesta	Plant	1	1	0	None	A1	1	Monitoring	Huusela et al. 2021
Sciurus carolinensis	Mammal	1	1	0	Minor	B2	1	Prevention of entry	Huusela-Veistola et al. 2017
Sciurus niger	Mammal	1	1	0	Minor	A1	1	Prevention of entry	Huusela-Veistola et al. 2017
Solenopsis geminata	Insect	1	1	0	Minor	A1	1	Monitoring	Huusela et al. 2023
Solenopsis invicta	Insect	1	1	0	Minor	A1	1	Monitoring	Huusela et al. 2023
Solenopsis richteri	Insect	1	1	0	Minor	A1	1	Monitoring	Huusela et al. 2023
Tamias sibiricus	Mammal	2	2	D, E	Moderate	B3	2	Prevention of escape	Huusela-Veistola et al. 2017
Threskiornis aethiopicus	Bird	1	1	0	None	A1	1	Monitoring	Huusela-Veistola et al. 2017
Trachemys scripta	Reptile	4	4	E	Minor	B2	2	Prevention of escape	Huusela-Veistola et al. 2017
Triadica sebifera	Plant	1	1	0	None	A1	1	Prevention of entry	Huusela et al. 2021					61
Vespa velutina nigrithorax	Insect	1	1	0	None	A1	1	Monitoring	Huusela-Veistola et al. 2017
Wasmannia auropunctata	Insect	1	1	0	Minor	A1	1	Monitoring	Huusela et al. 2023
Xenopus laevis	Amphibian	2	3	A, B, D	None	B1	3	Prevention of escape	Huusela et al. 2023

## Sheet: Metadata
Data combiled from the Finnish national risk assessments
Only the primary variables from the risk assesments are included in the table
Variables from the risk assessment protocol
Distribution of species in Finland
1 = No observations from Finland
2 = Species is occasionally kept as a pet / a garden plant indoors or in garden
3 = Species is commonly kept as a pet / a garden plant indoors or in garden
4 = Species has occasionally been observed in the wild in Finland (during last 10 years)
5 = Species has regularly been observed in the wild in Finland (no reproducing population)
6 = Species has established in the wild in Finland (reproducing population)
Species succeeds in Finnish climate conditions (potential for spread and reproduction)
1 = Low probability or not likely
2 = Moderate probability
3 = High probability
4 = Is known to succeed (verified)
Means of spread to the wild (principal)
0 = Not likely spread to Finland
A = Intentional spread by humans outside Finland
B = Unintentional spread by humans outside Finland
C = Natural spread from neighbouring countries
D = Intentional spread by humans within Finland
E = Unintentional spread by humans within Finland
F = Natural spread within Finland
Overall impact
Combined as overall impact category by summing the answers of single questions as follows:
Would species harm native species by predation, competition, spreading diseases/parasites, breeding or other way? (If native species is endangered, this is critical)
Would species harm natural habitats and/or ecosystems by chancing or destroying them or by affecting food chain?
Would species have economic or social harm for society?
Would species harm human health or security?
No impact = overall impact sum = 5
Low impact = overall impact sum = 6-10
Moderate impact = overall impact sum = 11-15
Major impact = overall impact sum =16-20
Massive impact = known, massive impact of widespread, established species. Overall impact sum >20
Establishment status of species in Finland
A1 = Spreading and success very unlikely
B1 = Propagules of species do not spread regularly, establishment in the wild possible
B2 = Propagules of species spread regularly, establishment in the wild unlikely
B3 = Establishment of species possible
C1 = Established, but locally distributed
C2 = Established and widely distributed
Urgency of management measures
1 = Management not topical in Finland
2 = Monitoring situation
3 = Control at the early stage of invasion
4 = Immediate measures (established species)
Recommended primary management measures for species
The original classification of primary management recommendations (1 = Monitoring distribution (outside Finland), 2 = Prevention of entry, 3 = Prevention of escape into nature, 4 = Prevention of establishment, 5 = Prevention of further spread, 6 = Management of areas with high biodiversity value, 7 = Eradication, 8 = No cost-effective eradication methods available) were reorganized as follows:
Monitoring = When monitoring of the species distribution as primary management measure (value 1)
Prevention of entry = If given primary management measures were monitoring together with prevention of entry (1 and 2) or prevention of entry alone (2)
Prevention of escape = if given management measure were prevention of entry and escape (2 and 3) or solely prevention of escape (3)
Prevention of spread = If prevention of further spread and the management of areas with high biodiversity values (5 and 6) or solely management of areas with high biodiversity value were classified (6) as the primary management measure.
Eradication = If eradication was given as the only or one of the primary management measures (different combinations of given values: 7 or 1, 3, 7 or 2, 3, 7 or 5, 7).
Reference
Huusela-Veistola, E.; Erkamo, E. ; Holmala, K. ; Hyvönen, T. ; Juhanoja, S. ; Kauhala, K. ; Koikkalainen, K. ; Lehtiniemi, M. ; Miettinen, A. ; Pouta, E. ; Ryttäri, T. ; Räikkönen, N. ; Teeriaho, J. ; Tulonen, J.; Tuhkanen, E.-M. ; Urho, L. 2017. Ehdotus haitallisten vieraslajien hallintasuunnitelmaksi. Helsinki, Finland: Valtioneuvoston kanslia. Valtioneuvoston selvitys- ja tutkimustoiminnan jul…
Huusela-Veistola, E. ; Holmala, K. ; Hyvönen, T. ; Kauhala, K. ; Ryttäri, T. ; Tuhkanen, E.-M ; Urho, L. Ehdotus haitallisten vieraslajien hallintasuunnitelmaksi ja leviämisväyliä koskevaksi toimintasuunnitelmaksi. Helsinki, Finland: Valtioneuvoston kanslia Valtioneuvoston selvitys- ja tutkimustoiminnan julkaisusarja 2019, 4, 94 p. http://urn.fi/URN:ISBN:978-952-287-633-1
Huusela, E. ; Hyvönen, T. ; Jauni, M. ; Rastas, M. ; Seimola, T. ; Tuhkanen, E.-M. ; Urho, L. ; Velmala, S. 2021. Ehdotus haitallisten vieraslajien hallintasuunnitelmaksi EU-luettelon toisen täydennysluettelon lajeille. Luonnonvarakeskus. Helsinki, Luonnonvara- ja biotalouden tutkimus 1/2021, 1, . 71 p. http://urn.fi/URN:ISBN:978-952-380-140-0
Huusela, E.; Hyvönen, T.; Jauni, M.; Herrero, A.; Kuningas, S.; Ruokonen, T. A.; Seimola, T.; Sorvari, J.; Tuhkanen, E.-M.; Velmala, S. Ehdotus Haitallisten Vieraslajien Hallintasuunnitelmaksi EU-Luettelon Kolmannen Täydennysluettelon Lajeille; Luonnonvara- ja Biotalouden Tutkimus; Luonnonvarakeskus: Helsinki, Finland, 2022; Unpublished draft.
